## Digging deeper into GWAS signal using GRIN implicates additional genes contributing to suicidal behavior

Kyle A. Sullivan<sup>1</sup>, Matthew Lane<sup>2</sup>, Mikaela Cashman<sup>1</sup>, J. Izaak Miller<sup>1</sup>, Mirko Pavicic<sup>1</sup>, Angelica M. Walker<sup>2</sup>, Ashley Cliff<sup>2</sup>, Jonathon Romero<sup>2</sup>, Xuejun Qin<sup>3,4</sup>, Jennifer Lindquist<sup>3</sup>, Niamh Mullins<sup>5,6</sup>, Anna Docherty<sup>7</sup>, Hilary Coon<sup>7,8</sup>, Douglas M. Ruderfer<sup>9,10,11,12</sup>, International Suicide Genetics Consortium, VA Million Veteran Program, MVP Suicide Exemplar Workgroup, Michael R. Garvin<sup>1</sup>, John P. Pestian<sup>1,13</sup>, Allison E. Ashley-Koch<sup>4,15</sup>, Jean C. Beckham<sup>3,14,15</sup>, Benjamin McMahon<sup>16</sup>, David W. Oslin<sup>17,18</sup>, Nathan A. Kimbrel<sup>\*3,4,15,19</sup>, Daniel A. Jacobson<sup>\*1</sup>, and David Kainer<sup>\*1</sup>

### Affiliations:

<sup>1</sup> Computational and Predictive Biology, Oak Ridge National Laboratory, Oak Ridge, TN, USA

<sup>2</sup> The Bredesen Center for Interdisciplinary Research and Graduate Education, University of Tennessee Knoxville, Knoxville, TN, USA

<sup>3</sup> Durham Veterans Affairs Health Care System, Durham, NC, USA

<sup>4</sup> Duke University School of Medicine, Duke University, Durham, NC, USA

<sup>5</sup> Department of Genetics and Genomic Sciences, Icahn School of Medicine at Mount Sinai, New York City, NY, USA

<sup>6</sup> Department of Psychiatry, Icahn School of Medicine at Mount Sinai, New York City, NY, USA

<sup>7</sup> Department of Psychiatry, University of Utah School of Medicine, Salt Lake City, UT, USA

<sup>8</sup> Huntsman Mental Health Institute, University of Utah School of Medicine, Salt Lake City, UT, USA

<sup>9</sup> Division of Genetic Medicine, Vanderbilt University Medical Center, Nashville, TN, USA

<sup>10</sup> Vanderbilt Genetics Institute, Vanderbilt University Medical Center, Nashville, TN, USA

<sup>11</sup> Department of Biomedical Informatics, Vanderbilt University Medical Center, Nashville, TN, USA

<sup>12</sup> Department of Psychiatry and Behavioral Sciences, Vanderbilt University Medical Center, Nashville, TN, USA

<sup>13</sup> Cincinnati Children's Hospital Medical Center, University of Cincinnati, Cincinnati, OH, USA

<sup>14</sup> Department of Psychiatry and Behavioral Sciences, Duke University Medical Center, Durham, NC, USA

<sup>15</sup> VISN 6 Mid-Atlantic Mental Illness Research, Durham Veterans Affairs Health Care System, Durham, NC, USA

<sup>16</sup> Theoretical Biology and Biophysics, Los Alamos National Laboratory, Los Alamos, NM, USA

<sup>17</sup> VISN 4 Mental Illness Research, Education, and Clinical Center, Center of Excellence, Corporal Michael J. Crescenz VA Medical Center, Philadelphia, PA, USA

<sup>18</sup> Department of Psychiatry, Perelman School of Medicine, University of Pennsylvania, PA, USA

<sup>19</sup> VA Health Services Research and Development Center of Innovation to Accelerate Discovery and Practice Transformation, Durham, NC

\* Correspondence: [kainerd@ornl.gov](mailto:kainerd@ornl.gov), [jacobsonda@ornl.gov](mailto:jacobsonda@ornl.gov), [nathan.kimbrel@va.gov](mailto:nathan.kimbrel@va.gov)

This manuscript has been authored by UT-Battelle, LLC under Contract No. DE-AC05-00OR22725 with the U.S. Department of Energy. The United States Government retains and the publisher, by accepting the article for publication, acknowledges that the United States Government retains a non-exclusive, paid-up, irrevocable, world-wide license to publish or reproduce the published form of this manuscript, or allow others to do so, for United States Government purposes. The Department of Energy will provide public access to these results of federally sponsored research in accordance with the DOE Public Access Plan (<http://energy.gov/downloads/doe-public-access-plan>).

## 1 **Abstract**

2           Genome-wide association studies (GWAS) identify genetic variants underlying complex  
3 traits but are limited by stringent genome-wide significance thresholds. Here we dramatically  
4 relax GWAS stringency by orders of magnitude and apply GRIN (Gene set Refinement through  
5 Interacting Networks), which increases confidence in the expanded gene set by retaining genes  
6 strongly connected by biological networks from diverse lines of evidence. From multiple GWAS  
7 summary statistics of suicide attempt, a complex psychiatric phenotype, GRIN identified  
8 additional genes that replicated across independent cohorts and retained genes that were more  
9 biologically interrelated despite a relaxed significance threshold. We present a conceptual model  
10 of how these retained genes interact through neurobiological pathways to influence suicidal  
11 behavior and identify existing drugs associated with these pathways that would not have been  
12 identified under traditional GWAS thresholds. We demonstrate that GRIN is a useful community  
13 resource for improving the signal to noise ratio of GWAS results.

## 14 **Introduction**

15           Genome-wide association studies (GWAS) can identify the genetic basis of complex  
16 phenotypes but interpreting the results of these studies is often challenging. SNP-level results  
17 from GWAS often need gene assignment for understanding downstream functions, but SNP-to-  
18 gene assignment is challenging for intergenic SNPs<sup>1-4</sup>. Moreover, while the resulting gene set  
19 may contain genes that affect the phenotype, these “true positive” genes are often interspersed  
20 with false positives as a consequence of confounding experimental factors and incorrect SNP-to-  
21 gene assignments. False positive genes can mislead efforts to understand the genetic architecture  
22 of a trait, so it is important that they are filtered out. This becomes even more crucial for GWAS

23 that produce few associated genes at traditional genome-wide significance (i.e.,  $p < 5e^{-8}$ ). For  
24 these cases it is often necessary to investigate SNPs at less stringent  $p$ -value thresholds to find  
25 relevant loci, at the risk of introducing false positives.

26 Polygenic traits are typically influenced by genes from multiple pathways working in  
27 concert with each other within the broader biological system<sup>5</sup>. Given enough information from  
28 diverse experimental sources, it should be possible to find functional lines of biological evidence  
29 connecting any pair of truly causal genes to each other more strongly than pairs of random genes.  
30 When considered as a set (e.g., from a GWAS or differential gene expression), the true positive  
31 causal genes are very likely to be functionally connected to one another. Conversely, false  
32 positive genes from a GWAS will likely be random and therefore far less functionally connected  
33 to the other genes in the set. Given a gene set, one could conceivably determine which genes are  
34 most likely to be false positives if the gene set can be parsed effectively by including thorough  
35 gene interaction information.

36 To solve this important biological problem, we present GRIN – Gene set Refinement  
37 through Interacting Networks – an approach that removes biologically disparate, false positive  
38 genes in a gene set based upon biological network topology. GRIN uses a network representation  
39 of system-wide gene-to-gene interactions from diverse experimental sources. Starting from a  
40 user-defined gene set, GRIN explores the network topology to determine how strongly these  
41 genes are interconnected. Next, GRIN compares the connectivity among these genes to the  
42 connectivity found among random genes to determine which of the user’s genes are likely to be  
43 false positives. We validated GRIN by testing its ability to separate well-characterized,  
44 functionally related “gold standard” genes from random genes using a large multiplex network<sup>6</sup>.

45 We then applied GRIN to suicide attempt GWAS summary statistics, a complex  
46 psychiatric phenotype. Even though heritability estimates range from 17-55%<sup>7,8</sup>, this psychiatric  
47 disorder has elicited few genome-wide significant variants to date<sup>8-11</sup>. We analyzed independent  
48 suicide attempt GWAS results from the Million Veteran Program (MVP<sup>11</sup>) and the International  
49 Suicide Genetics Consortium (ISGC<sup>9</sup>). As few variants were significant at traditional genome-  
50 wide significance, we explored SNPs at a less stringent threshold and used multiple SNP-to-gene  
51 assignment methods to elucidate the underlying mechanisms of the heritable components of  
52 suicidality. GRIN identified genes with higher probability of contributing to suicide attempt  
53 pathophysiology, reducing false positive genes. Thus, we demonstrate GRIN's utility in  
54 identifying key biological mechanisms from GWAS signals, and subsequently identify putative  
55 drug targets for future suicide prevention studies.

## 56 **Results**

### 57 **GRIN workflow.**

58 A summary of the GRIN workflow is presented in **Figure 1**. GRIN inputs include a gene  
59 set and a previously generated multiplex network. In Stage 1, all experimentally-derived (*e.g.*,  
60 GWAS) “seed” genes are ranked based upon biological network connectivity. GRIN also  
61 performs this task on random gene sets of equivalent size to produce an empirical null rank  
62 distribution. In Stage 2, a sliding window is used to compare the ordered ranks of  
63 experimentally-derived genes to the equivalent ordered ranks within the null distribution using  
64 the Mann-Whitney U test, and the *p*-value of the Mann-Whitney U test is plotted for each  
65 window to form a curve. The elbow of this curve indicates the cutoff point at which the ranks are  
66 equivalent between the seed gene set and the null distribution (indicating low functional  
67 interrelatedness), and genes following this cutoff point are filtered out.

68

69 **GRIN accurately removes false positive genes as determined by benchmarking with**  
70 **biologically interrelated, “gold standard” gene sets.**

71 We first tested GRIN on 30 biologically-interrelated, “gold standard” gene sets mixed  
72 with an equivalent amount of randomly drawn genes (1:1 ratio), and repeated this 100 times per  
73 gold standard gene set (**Fig. 2A, Supplementary Table 1**). GRIN Stage 1 ranked gold standard  
74 genes more highly than most random genes in any given test set, achieving median area under  
75 the receiver operating characteristic curve (AUROC) and median area under the precision-recall  
76 curve (AUPRC) values of  $0.950 \pm 0.059$  and  $0.896 \pm 0.084$  respectively across the 30 gold  
77 standard gene sets (**Fig. 2B-C**). This indicated highly accurate gene ranking in GRIN Stage 1,  
78 which is necessary for successful outcomes at Stage 2. GRIN Stage 2 effectively classified true  
79 and false positive genes at the cutoff point (median precision  $0.810 \pm 0.134$ ; recall  $0.914 \pm$   
80  $0.167$ ; specificity  $0.880 \pm 0.197$ ; **Fig. 2D, Supplementary Fig. 1**). On average, 46.0% of the  
81 gene set was discarded as noise ( $0.460 \pm 0.143$ ), and less than 9% of true positive gold genes  
82 were discarded (median recall 0.914).

83 Next, we tested GRIN’s ability to refine gene sets containing varying proportions of  
84 random genes. When gold standard genes outnumbered random genes by 2:1, precision ( $0.967 \pm$   
85  $0.060$ ), recall ( $0.735 \pm 0.331$ ), and specificity ( $0.971 \pm 0.088$ ) were consistently high compared  
86 to expected values from random classification (precision = 0.66, specificity = 0.66). Precision,  
87 recall, and specificity values decreased as the ratio of gold genes to random genes in the gene  
88 sets decreased (1:1, 1:2, 1:4) but were consistently better than random chance (**Fig. 2E,**  
89 **Supplementary Fig. 2**).

90 Finally, we tested whether GRIN could retain multiple distinct functional groups when  
91 mixed with random genes. This test case is important since a real-world gene set for a complex  
92 trait is likely to contain multiple functional groups. When given gene sets with two distinctive  
93 biological functions (“dopaminergic synaptic signaling” and “myelination”) at 1:1 or 2:1 ratios  
94 of gold standard genes to random genes, GRIN generated much better precision and specificity  
95 compared to random chance while retaining high values for recall (2:1 merged gold  
96 standard:random – precision:  $0.931 \pm 0.042$ , recall:  $0.742 \pm 0.141$ , specificity:  $0.891 \pm 0.094$ ;  
97 1:1 merged gold standard:random – precision:  $0.789 \pm 0.103$ , recall:  $0.930 \pm 0.116$ , specificity:  
98  $0.767 \pm 0.174$ ; **Fig. 2F**).

99

100 **GRIN retains biologically interrelated genes from the Million Veteran Program (MVP)**  
101 **suicide attempt GWAS at less stringent significance thresholds.**

102 After benchmarking GRIN on gold standard gene sets, we applied it to suicide attempt  
103 GWAS summary statistics from the Million Veteran Program (MVP<sup>11</sup>) to understand which  
104 genes contribute to psychiatric pathophysiology in this military veteran population. We utilized  
105 both conventional MAGMA<sup>4</sup> and H-MAGMA<sup>1</sup> solely for gene assignment from SNPs at  
106 different genome-wide significance thresholds (**Fig. 3A**). Only five SNPs were significant below  
107 the traditional threshold of genome-wide significance ( $p < 5e^{-8}$ ) which were assigned to three  
108 total genes (*SPATA17*, *TSHZ2*, and *ENSG00000227705*; **Supplementary Tables 2 and 3**). In  
109 order to explore additional genes contributing to suicide attempt pathophysiology, we explored  
110 markedly less stringent  $p$ -value thresholds which expanded the GWAS-derived gene sets. We  
111 only examined SNPs and resulting genes at the  $p < 1e^{-5}$  threshold since the numbers of genes

112 obtained at less stringent thresholds became unwieldy to interpret in a unified context  
113 **(Supplementary Table 2).**

114 MVP SNPs were assigned to 122 genes at  $p < 1e^{-5}$  **(Supplementary Tables 2 and 4)**. We  
115 applied GRIN to this gene set in order to limit the higher number of potential false positive genes  
116 introduced at this threshold. GRIN retained 65 genes and removed 57 genes from the gene set  
117 **(Fig. 3B-C, Supplementary Table 5)**. Next, to determine if GRIN successfully retained  
118 biologically interrelated genes we used ToppGene<sup>12</sup> to compare a variety of gene set enrichments  
119 **(Methods)** of MVP genes before and after GRIN. The 122 unfiltered genes were not  
120 significantly enriched for any GO terms but were enriched for 203 combined drug and disease  
121 enrichments, including “substance dependence” (DisGeNET C0038580; **Supplementary Table**  
122 **6**). Intriguingly, after refining the gene set with GRIN, 1449 enrichments were significant from  
123 65 retained genes, including 18 transcription factor binding sites and five GO molecular function  
124 enrichments (*e.g.*, “adenyl ribonucleotide binding,” **Supplementary Table 7**). Conversely,  
125 GRIN removed 57 genes that manifested no significant enrichments. Thus, filtering MVP genes  
126 at a far less stringent GWAS significance threshold with GRIN resulted in a more functionally  
127 enriched gene set by improving the signal-to-noise ratio.

128  
129 **GRIN retains biologically interrelated genes from multiple International Suicide Genetics**  
130 **Consortium (ISGC) GWAS at a less stringent significance threshold.**

131 We sought to identify which genes retained by GRIN from MVP were replicated in two  
132 independent, civilian suicide attempt GWAS compiled by the International Suicide Genetics  
133 Consortium (ISGC<sup>9</sup>). This study contained summary statistics from: 1) a European ancestry  
134 GWAS of suicide attempt in civilians (SA-EUR) and 2) a GWAS of the SA-EUR population

135 conditioned by major depressive disorder (MDD) diagnosis status (SA-MDD). At a threshold of  
136  $p < 5e^{-8}$ , only seven SA-EUR genes and three SA-MDD genes were significantly associated  
137 **(Supplementary Tables 2-3)**.

138 We then applied the same, less stringent significance threshold ( $p < 1e^{-5}$ ) to identify  
139 additional genes, and applied GRIN to remove potential false positives. Following SNP-to-gene  
140 assignment, 252 genes were identified from SA-EUR and 62 genes were identified from SA-  
141 MDD **(Supplementary Tables 2 and 4)**. Prior to GRIN, 25 genes were common to both SA-  
142 EUR and SA-MDD **(Fig. 4)**. Following GRIN, 11 genes were commonly retained from both sets  
143 of summary statistics, 8 genes were commonly removed, and 6 genes were removed or retained  
144 from one set only **(Fig. 4; Supplementary Tables 8-9)**. Next, we compared ToppGene gene set  
145 enrichments before and after GRIN to investigate if GRIN functionally refined these gene sets.  
146 At  $p < 1e^{-5}$ , 243 enrichments were significant from the unfiltered SA-EUR gene set, including 33  
147 transcription factor binding sites and 114 GO enrichments **(Supplementary Table 10)**. GRIN  
148 retained highly interrelated genes from SA-EUR as demonstrated by 274 significant enrichments,  
149 including 132 significantly enriched GO terms and 44 transcription factor binding sites  
150 **(Supplementary Table 11)**. Conversely, only two enrichments were obtained from removed  
151 SA-EUR genes, indicating little functional interrelatedness among these genes **(Supplementary**  
152 **Table 12)**. Similarly, 65 enrichments were identified from SA-MDD before GRIN while 247  
153 enrichments were identified in the GRIN retained gene set, including an enrichment for  
154 “schizophrenia,” a mental health disorder which presents an increased risk of suicidality  
155 (DisGeNET C0036341; **Supplementary Tables 13-14)**. Conversely, only 31 enrichments were  
156 identified in the removed gene set **(Supplementary Table 15)**. This strongly indicated that



157 GRIN-filtered SA-EUR and SA-MDD gene sets contained highly interrelated genes that were  
158 relevant to neurobiological pathways.

159

160 **GRIN retains a majority of genes from the union of the MVP and ISGC summary**  
161 **statistics, enhancing functional gene set enrichment.**

162 In a process similar to a meta-analysis, we applied GRIN to the union of MVP and ISGC  
163 genes to identify replicated genes across cohorts and identify unified biological mechanisms.  
164 Prior to applying GRIN, at  $p < 1e^{-5}$  one gene (*PDE4B*) was common among all results, three  
165 genes were common to only MVP and SA-EUR, and 24 genes were common to only SA-EUR  
166 and SA-MDD (**Fig. 5**). After applying GRIN to the union of all genes, 17 genes common to  
167 multiple summary statistics were retained (over 50%), including *PDE4B*, 2 out of 3 common  
168 genes between MVP and SA-EUR, and 14 out of 24 common genes between SA-EUR and SA-  
169 MDD (**Fig. 5, Supplementary Table 16**). Conversely, 8 genes between SA-EUR and SA-MDD  
170 and 1 gene between MVP and SA-EUR were commonly removed at this threshold (**Fig. 5,**  
171 **Supplementary Table 16**).

172 Next, we assessed GRIN's ability to improve gene set enrichment analysis using genes  
173 common to two or more sets of summary statistics. Prior to GRIN there were 1324 significant  
174 enrichments from the 28 genes common to multiple data sets (**Fig. 6, Supplementary Tables**  
175 **16-17**). Intriguingly, 1443 significant enrichments were obtained from the 17 genes commonly  
176 retained by GRIN in multiple data sets, including 126 GO terms such as “dopaminergic synapse”  
177 (**Fig. 6, Supplementary Table 18**). Conversely, only 358 enrichments were significant from the  
178 11 intersecting genes removed by GRIN, indicating lower interrelatedness among these genes  
179 compared to the retained set (**Supplementary Table 19**). In addition to introducing newly

180 enriched terms, GRIN improved the significance of the majority of enriched terms from the pre-  
181 filtered gene set. Of the 1324 enrichments obtained from the unfiltered set of genes common to  
182 multiple suicide attempt summary statistics, 1259 of these enrichments were retained; 1168 of  
183 these retained enrichments were more significant following GRIN, strongly indicating that  
184 retained genes constituted a more biologically cohesive set (**Fig. 6, Supplementary Tables 18-**  
185 **19**).

186 Similarly, when applying GRIN to each set of summary statistics separately, 13  
187 intersecting genes were commonly retained and 9 intersecting genes were commonly removed  
188 (**Supplementary Fig. 3, Supplementary Table 20**). This resulted in more numerous and  
189 statistically significant gene set enrichments using intersecting GRIN-retained genes compared to  
190 the unfiltered gene set or GRIN-removed genes (**Supplementary Fig. 4, Supplementary Tables**  
191 **21-22**).

192

### 193 **Retained genes from GRIN identify putative pathophysiological pathways involved in** 194 **suicide attempt, leading to drug repurposing/side effect candidates.**

195 Using genes retained by GRIN, we identified biological pathways implicated by suicide  
196 attempt GWAS (**Fig. 7**). Only one of the three genes identified from MVP GWAS at  $p < 5e^{-8}$   
197 (*TSHZ2*) was retained by GRIN at  $p < 1e^{-5}$ . Multiple genes identified in both cohorts were  
198 relevant to dopaminergic signaling, including the dopamine D2 receptor subunit (*DRD2*) and  
199 phosphodiesterase 4-beta (*PDE4B*) as well as a protein kinase A subunit (*PRKAR2A*) from MVP,  
200 which can subsequently modulate cAMP/CREB-mediated transcription of genes important for  
201 synaptic plasticity<sup>13</sup>. Additionally, *SGIP1* was retained by GRIN in MVP and SA-EUR summary  
202 statistics, which affects presynaptic vesicle release and emotional state<sup>14,15</sup>. Furthermore, genes

203 involved in neurotransmitter release (*BRSKI*) and glutamatergic synapses (*CELSR3<sup>16</sup>*) were  
204 identified along with *ICE2*, which is induced by NMDA receptor activity<sup>17,18</sup>. *NCAMI* was also  
205 retained by GRIN, which is a crucial mediator of synaptic plasticity and memory processes<sup>19,20</sup>.  
206 Multiple genes involved in cytoskeletal reorganization were also identified including  
207 *CDC42BPB*, *MAP4*, and *MARK3*. Moreover, *TSHZ2*, *SMARCC1*, and *ZNF589* were retained by  
208 GRIN and have been implicated in neurodevelopmental processes while *RCOR1* is important for  
209 neural progenitor differentiation into neuronal and glial subtypes<sup>13,21–24</sup>. Finally, a number of  
210 genes involved in global translation processes were identified (*DALRD3*, *DHX30*, and *EIF5*),  
211 two of which have been previously implicated in neurodevelopmental disorders arising from  
212 missense variants<sup>25,26</sup> (**Fig. 7**).

213 Finally, we identified drugs that may modulate suicidal behavior based on GWAS-  
214 implicated genes retained by GRIN. Multiple drugs target the dopamine D2 receptor subunit,  
215 including the FDA-approved drugs clozapine (used to prevent suicidal behavior in  
216 schizoaffective individuals<sup>27</sup>) and amisulpride (**Fig. 8, Supplementary Table 23**). Roflumilast  
217 and a number of other molecular compounds also directly affect *PDE4B*. Furthermore,  
218 fostamatinib is known to affect 8 genes implicated in both MVP and SA-EUR suicide attempt  
219 GWAS. These drug-gene target links warrant future studies to ensure that they do not present  
220 increased risk for suicidality as a side effect, and to evaluate candidates for drug repurposing for  
221 suicide prevention.

## 222 **Discussion**

223 Here we introduced GRIN, a workflow based on networks of biological relationships to  
224 enable the relaxing of GWAS thresholds while reducing the impact of false positives, thus

225 producing an expanded prioritized gene set compared to a GWAS using the standard significance  
226 threshold. Genome-wide association studies are subject to statistical challenges that have  
227 historically made it difficult to identify a large proportion of trait-relevant genes. In human  
228 studies, genes that may contribute to disease have traditionally been identified from SNP  
229 associations at a genome-wide significance threshold of  $p < 5e^{-8}$ , but for many traits GWAS  
230 often fails to find a comprehensive signal at this stringent threshold, especially complex traits  
231 controlled by many small-effect loci. Yet we know that much of the signal of heritability lies  
232 below this threshold. Relaxing the stringency gives access to more SNPs (and hence more genes)  
233 that may be associated with the trait, at the risk of introducing an increasing proportion of false  
234 positives that will confound downstream analyses. GRIN operates on the concept that genes  
235 affecting the same trait are likely to have some sort of functional relationship, even if based upon  
236 minor and/or indirect effects. Given a set of genes from a GWAS, true positive genes should  
237 therefore be functionally related to each other in some way, while false positive genes will be  
238 functionally distant with respect to each other and with respect to the true positive genes. We  
239 demonstrated that GRIN accurately partitions an input gene set into two subsets based on this  
240 mechanism and used it to boost GWAS signals. In contrast to other network-based propagation  
241 tools for enhancing GWAS (*e.g.*, NAGA<sup>28</sup>, uKIN<sup>29</sup>, GWAB<sup>30</sup>), GRIN simultaneously enhances  
242 GWAS sensitivity while reducing the risk of false positive genes from being included.

243         The first stage of GRIN requires a representation of known relationships between all  
244 genes in a network format. Here we used a biological multiplex network which captures a wide  
245 variety of relationship types across its 10 layers. One could instead use a pre-existing network  
246 based on the species of interest, such as HumanNet<sup>31</sup>, YeastNet<sup>32</sup>, or AraNet<sup>33</sup>. However,

247 GRIN's capacity to accurately refine gene sets is limited by the connectivity represented in the  
248 network. A poor network lacking sufficient biological relationships would result in reduced  
249 ability to distinguish between functionally related genes and random noise. We therefore  
250 included various experimental data sources and generated a frontal cortex-specific predictive  
251 gene expression network using an explainable-AI methodology (iRF-LOOP<sup>34</sup>), which can define  
252 relationships that were not present in the literature. This novel, tissue-specific weighted network  
253 is a powerful community resource, as iRF-LOOP-derived networks can contain more informative  
254 relationships compared to traditional gene co-expression networks by an order of magnitude<sup>34</sup>.

255 Determining the functional relatedness between the genes in a GWAS gene set can be  
256 performed by many algorithms that operate on a biological network. Network propagation  
257 algorithms use information encoded in the topology of each layer simultaneously, providing a  
258 systems-level view of gene-to-gene relationships. Utilizing one such algorithm (random walk  
259 with restart, RWR), we achieved high AUROC, AUPRC, precision, recall, and specificity.  
260 Future studies are warranted to explore which sources of experimental data (*e.g.*, protein-protein  
261 interaction, transcription factor binding) are most influential for retaining biologically  
262 interrelated genes with GRIN.

263 We demonstrated that GRIN works with simulated noisy gene sets similar to what is  
264 obtained from a GWAS or differential gene expression experiment. GRIN successfully  
265 partitioned curated gene sets spiked with random genes into signal and noise subsets, even when  
266 given multiple functional groups or a high noise ratio. The results confirm that RWR indeed  
267 ranks the functional group(s) of genes highly while random genes mostly receive poor rankings.  
268 When applied to real-world data, it is up to GRIN's second stage to determine the optimal cutoff

269 point that divides functional genes from false positive genes. The strong simulated test results  
270 provide confidence that when GRIN is applied to GWAS results, the true positive genes should  
271 rise to the top of the rankings as long as they are more functionally related to each other than  
272 random genes are, thus providing a retained set that has a higher signal-to-noise ratio than if  
273 GRIN was not used at all.

274         After applying GRIN to expanded GWAS results at  $p < 1e^{-5}$ , we obtained more gene set  
275 enrichments in the retained set with consistently higher levels of significance, despite this set  
276 being considerably smaller. Thus, GRIN removed false positives that were diluting the functional  
277 signal in the original gene set. The fact that the removed gene set was scarcely enriched supports  
278 this argument. By separating a gene list into retained and removed subsets, the user can identify  
279 additional biologically relevant pathways that may be missed by enrichment analyses on the  
280 whole set alone due to dilution with noise.

281         While we demonstrated that GRIN achieves high accuracy using gold standard gene sets,  
282 GRIN sometimes discarded true positive genes. This indicates that not all genes removed by  
283 GRIN are necessarily irrelevant to the trait or disease, and the removed set should be considered  
284 but with lower confidence than the retained set. It is also important to consider the possibility for  
285 false positives and false negatives to be re-classified as new experimental data sources become  
286 available. For example, some genes removed by GRIN currently have few experimental gene-  
287 gene network relationships (*e.g.*, the non-coding RNA *RP11-839D17.3* and pseudogene  
288 *MRPS21P1*). However, future experiments may identify their capacity to modulate  
289 transcriptional or post-transcriptional processes with pathophysiological implications. Therefore,

290 GRIN output should be considered as guidance rather than a definitive determination of what is a  
291 true or false positive.

292 Combined with multiple SNP-to-gene assignments, incorporating SNPs at a less stringent  
293 significance threshold and applying GRIN elucidated additional suicide-associated genes and  
294 pathways. In addition to conventional MAGMA, we leveraged frontal cortex-specific chromatin  
295 accessibility and H-MAGMA which refined SNP-to-gene assignment. While certain variants  
296 have been previously described (*e.g.*, variants in *DRD2*, *PDE4B*, and *SPATA17*<sup>8,9,11</sup>), the present  
297 study characterizes additional genes contributing to dendritic structure and multiple key  
298 neurotransmitter pathways associated with suicidality. Among these additional genes, missense  
299 variants in *CDC42BPB*<sup>35</sup>, *DALRD3*<sup>26</sup>, *DHX30*<sup>25</sup>, *SMARCC1*<sup>22</sup>, and *ZNF589*<sup>36</sup> are known to  
300 impair behavioral and neurodevelopmental processes. While the genetic variants in the present  
301 study did not include these missense or loss-of function variants, it is possible that the variants  
302 implicated in the present suicide attempt summary statistics may alter the transcription of these  
303 genes. For example, the retained gene sets were enriched for multiple transcription factor binding  
304 sites, including an NFAT transcription factor binding site enrichment common to each GWAS  
305 based on different genes (TGGAAA, TRANSFAC NFAT\_Q4\_01; **Supplementary Tables 7,**  
306 **11, and 14**). Variants leading to differential gene transcription may have downstream  
307 developmental or behavioral consequences leading to increased impulsivity and ultimately an  
308 increased risk of suicidality. In addition, multiple genes were implicated in cytoskeletal  
309 reorganization. *CDC42BPB* encodes MRCKbeta, a protein kinase that is induced by long-term  
310 potentiation in rodent models and mediates dendritic spinogenesis by actin-myosin filament  
311 phosphorylation<sup>37,38</sup>. *MAP4* is a microtubule-associated protein (MAP) and *MARK3* has been  
312 shown to phosphorylate tau (*MAPT*), another MAP which accumulates in multiple

313 neurodegenerative disorders<sup>39,40</sup>. Moreover, *RCOR1* is a subunit of the REST/CoREST complex  
314 and has been shown to affect *CELSR3* and *SMARCC1* transcription in mouse models<sup>16,22</sup>, and  
315 *SMARCC1* has been implicated in autism as a core component of the SWI/SNF complex<sup>23,41</sup>.  
316 These findings point to the possible pleiotropic nature of these genes being associated with  
317 multiple neurological disorders.

318 By lowering the significance threshold and applying GRIN to refine suicide GWAS gene  
319 sets, we identified previously characterized drug targets (*DRD2*, *MARK3*, and *PDE4B*) and drug  
320 repurposing/side effect candidates that would not have been detected otherwise. Notably, the  
321 *DRD2* antagonist clozapine is the only FDA-approved drug with on-label use to prevent suicidal  
322 behavior<sup>27</sup>. Amisulpride is also a *DRD2* antagonist that has been shown to exhibit antipsychotic  
323 and antidepressant activities<sup>42</sup>. Intriguingly, fostamatinib targets 8 genes implicated by suicide  
324 attempt GWAS including *MARK3* and *PDE5B*, a different phosphodiesterase than the *PDE4B*  
325 gene implicated in suicide attempt GWAS<sup>43</sup>. Moreover, it is important to understand if drugs can  
326 present adverse side effects modulating suicidal behavior. For example, the *PDE4B* inhibitor  
327 roflumilast has a rare adverse side effect of increased suicidality in some individuals<sup>44</sup>. Further  
328 studies are warranted to understand how pharmacological manipulation of these GWAS-  
329 implicated drug targets affect the propensity of suicidal behaviors in at-risk individuals.

330 GRIN is a powerful tool for identifying biologically interrelated genes and for identifying  
331 true positive variants and associated genes from GWAS. In effect, GRIN synthesizes multiple  
332 lines of evidence to determine which genes should be investigated further, automating a task that  
333 researchers usually do manually post-GWAS. By applying this tool to multiple GWAS results,



334 we identify new genes involved in suicide pathophysiology that may lead to important clinical  
335 insights.

### 336 **Acknowledgements and Disclosures**

337 This research used resources of the Oak Ridge Leadership Computing Facility at the Oak Ridge  
338 National Laboratory, which is supported by the Office of Science of the U.S. Department of  
339 Energy under Contract No. DE-AC05-00OR22725. GWAS summary statistics from the Million  
340 Veteran Program used in this study will be made available on the NIH database of Genotypes  
341 and Phenotypes (dbGaP) under accession ID phs001672.v1.p. Summary statistics from the  
342 International Suicide Genetics Consortium are available at <https://tinyurl.com/ISGC2021>. The  
343 authors declare no competing interests.

### 344 **Funding Sources**

345 This work was sponsored by MVP CHAMPION (DAJ), NIH grants DA041913 (DAJ),  
346 DA051908 (DAJ), MH116269 (DMR), MH121455 (DMR), Brain & Behavior Research  
347 Foundation (NARSAD Young Investigator Award No. 29551 [NM]), Department of Veterans  
348 Affairs (VA) Clinical Science Research and Development (CSR&D) grants 1K6BX003777 (JCB,  
349 NAK, DWO) and 1K6BX003777 (JCB), and the VA Million Veteran Program (MVP). This  
350 publication does not represent the views of the VA or the United States Government. We also  
351 thank and acknowledge MVP (Office of Research and Development, Veterans Health  
352 Administration), the MVP Suicide Exemplar Workgroup, and the ISGC for their contributions to  
353 this manuscript. A complete listing of contributors from the MVP, MVP Suicide Exemplar  
354 Workgroup, and ISGC is provided in the Supplementary Materials.

## 355 **Author Contributions**

356 Conceptualization: KAS, DK, DAJ; Methodology: KAS, DK, DAJ; Software: KAS, ML, MCM,  
357 JIM, AC, JR, DK; Formal analysis: KAS, DK; Investigation: KAS, DK, XQ, JL, NM, DAJ;  
358 Resources: DR, XQ, DAJ; Writing - Original Draft: KAS, DK; Writing - Review & Editing:  
359 KAS, ML, MP, AMW, NM, AD, HC, DMR, MRG, AEAK, JCB, BM, DWO, NAK, DK, DAJ;  
360 Visualization: KAS, DK; Supervision: NAK, DAJ, DK; Project administration: AD, HC, DMR,  
361 JPP, AEAK, JCB, BM, DWO, NAK, DAJ; Funding acquisition: DMR, DK, DAJ.  
362

## 363 **Online Methods**

### 364 **Multiplex biological network generation.**

365 In order to capture biological relationships from diverse types of biological evidence, a  
366 multiplex network was assembled from weighted network connections (edges) from a  
367 combination of publicly available and newly generated monoplex (single layer) networks. A  
368 multiplex network has an advantage over aggregate multilayer networks in that the unique  
369 topology of each layer is maintained, resulting in generally higher functional predictive ability<sup>45</sup>.  
370 Multiple component networks from HumanNet v2<sup>31</sup> were used (co-functional links by co-  
371 citation, co-essentiality<sup>46</sup>, co-expression, molecular pathway databases, gene neighborhood,  
372 phylogenetic profile associations, and orthologous protein-protein interactions transferred from  
373 model organisms [CC, CE, CX, DB, GN, PG, IL]), and a protein-protein interaction (PPI)  
374 network was generated by merging the following networks into a single monoplex layer:  
375 HumanNet v2 component PPI networks (HT, LC), and high-confidence physical protein-protein  
376 interactions from STRING version 11.0<sup>47</sup> (taxa = 9606, protein.actions.v11.0, mode=binding,  
377 min score = 700). A transcription factor-gene network layer was included based on a previously  
378 published, human brain-specific transcription factor binding site network<sup>48</sup>. Newly generated  
379 Predictive Expression Networks (PENs) were obtained using the Iterative Random Forest -

380 Leave One Out Prediction (iRF-LOOP) method<sup>34,49</sup> using individual-level RNA-seq expression  
381 data from the Genotype-Tissue Expression (GTEx) project<sup>50</sup> from the frontal cortex (Brodmann  
382 area 9). The resulting multiplex network was built using RWRtoolkit  
383 (<https://github.com/dkainer/RWRtoolkit>), which incorporates command-line scripts and an R  
384 library for generating multiplex networks and running the network exploration algorithm random  
385 walk with restart (RWR) by building upon the RandomWalkRestartMH R package<sup>45</sup>. The  
386 multiplex network used for all analyses comprises 10 layers, 51,183 unique genes, and 3,419,975  
387 edges using  $\delta = 0.5$ , where  $\delta$  is the probability of the random walker remaining in the current  
388 network layer or moving to a different layer. The multiplex network used for all analyses is  
389 publicly available at  
390 [https://github.com/sullivanka/GRIN/tree/main/test/suicide\\_weighted\\_Multiplex\\_0.5Delta.RData](https://github.com/sullivanka/GRIN/tree/main/test/suicide_weighted_Multiplex_0.5Delta.RData).

391

### 392 **GRIN process.**

393 GRIN leverages the hypothesis that false positive genes in gene sets are likely to be  
394 functionally random with respect to the rest of the gene set, while true positive genes are likely to  
395 share function with other members of the gene set. Using this theory, GRIN partitions a gene set,  
396 such as from differential gene expression analysis or SNP-to-gene assignment from GWAS, into  
397 retained and removed genes in a two-stage process.

398 In Stage 1, every gene in the network is ranked according to how connected it is to the  
399 genes in the user-specified gene set (*e.g.*, GWAS-derived genes). This includes ranking the user-  
400 specified genes themselves by using leave-one-out cross-validation (LOOCV). GRIN can make  
401 use of any network exploration algorithm that can provide gene rankings. We chose RWR for its  
402 robustness, but other propagation methods (*e.g.*, PageRank, heat diffusion) can also achieve

403 this<sup>28,29,51</sup>. RWR provides each gene with a rank that is a proxy for how easily each gene in the  
404 network can be reached from the starting set of GWAS genes, including a rank for the GWAS  
405 genes themselves. Genes with many paths and interactions to one or more of the GWAS genes  
406 rank strongly, while genes that are isolated or distant from the GWAS genes rank poorly. In the  
407 current implementation, this RWR-based ranking occurs based on network propagation of  
408 probabilities of visiting a given gene in the multiplex network, which is based on a matrix  
409 representation of the edge weights between genes in the multiplex network (i.e., the supra-  
410 adjacency matrix composed of all intra- and inter-layer connections). Random walks are then  
411 simulated many times by propagating the probability of the random walker exploring a given  
412 gene beginning from the seed genes, and this process continues until the combined network  
413 probabilities no longer change between simulated random walks by a given threshold ( $1e^{-10}$ ),  
414 thereby achieving convergence based upon an asymptotic number of simulated random walks.  
415 The advantage of using a propagation algorithm like RWR is that genes that are not direct  
416 neighbors of GWAS genes may still rank highly due to indirect paths. Additional parameters can  
417 be used to tune RWR to favor certain network layers ( $\tau$ ) or adjust the probability of restart ( $r$ ) at  
418 seed genes. In all analyses in the present study, we used  $r = 0.7$ , equivalent  $\tau$  values for all  
419 network layers, and a multiplex network with  $\delta = 0.5$  based on previous work that achieved good  
420 performance using these parameters<sup>45</sup>.

421 To obtain accurate rankings for each gene in a gene set of size  $n$ , we chose to implement  
422 random walk with restart leave-one-out cross validation (RWR-LOOCV)  $n$  times, where in each  
423 run one gene is left out and the other  $n-1$  genes are used as seed genes (starting points) for the  
424 random walker in the multiplex network. Each run of RWR-LOOCV generates a ranking of  
425 every non-seed gene in the multiplex, including the left-out gene from the original seed gene set,

426 so that each gene in the user's obtains  $n-1$  rank values after  $n$  runs. Stage 1 then orders the genes  
427 in the set from best to worst according to their median rank values. GRIN also needs a  
428 representation of what Stage 1 results should look like for purely random gene sets of size  $n$ .  
429 This empirical null distribution is generated by running RWR-LOO for 100 gene sets, each  
430 containing  $n$  randomly sampled genes from the multiplex. The median rank at each position in  
431 the order from 1 to  $n$  thus represents the empirical null distribution of ranks for this specific  
432 multiplex and gene set size.

433 In Stage 2, a cutoff  $C$  between 1 and  $n$  is determined below which all gene set members  
434 are considered the equivalent of random and can be discarded. A two-sided Mann-Whitney U  
435 test from the R stats base package ("wilcox.test") is performed over a sliding window of size  
436  $winsize = 0.15 \times n$  to see if the RWR-LOOCV ranks for the gene set members come from the  
437 same distribution as the null distribution RWR-LOOCV ranks. The expectation is that a gene set  
438 window containing functional groups of genes will have a very different ranking distribution to  
439 the random genes in the equivalent null window, resulting in very small (significant)  $p$ -values.  
440 On the other hand, if the window contains genes with little functional relatedness, the ranking  
441 distribution will appear to be drawn from the null distribution and the  $p$ -value tends towards 1.  
442 This test is run for each window sliding by 1, producing a  $p$ -value vector of length  $n-winsize$ .  
443 The cutoff  $C$  is chosen by finding an elbow in the  $p$ -values using the open source R package  
444 "Knee Arrower" with the method = "first" parameter set  
445 (<https://github.com/agentlans/KneeArrower>). The output is a *retained* gene set and a *removed*  
446 gene set.

447

#### 448 **Validation of GRIN using well-characterized gene sets.**

449 To determine the ability of GRIN to effectively remove noise genes from a gene set, we  
450 obtained a variety of well-characterized (“gold”) biologically interrelated gene sets and spiked  
451 them with random genes drawn from the full multiplex network. Given our application of this  
452 method to suicide GWAS summary statistics, we chose 20 gene sets related to diverse brain  
453 functions. We included an additional 10 gene sets related to other organ systems (lung and  
454 kidney) in order to demonstrate that GRIN could be adapted to other biological contexts. These  
455 thirty “gold standard” gene sets of functionally interrelated genes (see **Supplementary Table 1**),  
456 ranging in size from 10 to 225 genes, were derived from the following sources: Gene Ontology  
457 (GO<sup>52</sup>); Online Mendelian Inheritance in Man (OMIM<sup>53</sup>); and DisGENET<sup>54</sup>. Random genes were  
458 inserted into each gold set to create gene sets with a 1:1 signal-to-noise ratio (i.e.  $N_{\text{gold}} : N_{\text{random}}$ ).  
459 For each of the 30 gold sets we generated 100 test gene sets using varying samples of random  
460 genes. GRIN was then used to filter out random genes from each test gene set and the  
461 effectiveness of the filter was evaluated using receiver operator characteristics (ROC) and  
462 precision/recall (PR) measured at every possible cutoff point,  $C$ , in each rank-ordered gene set.

463 For evaluation purposes, “true positive” genes were labeled as genes belonging to a gold  
464 gene set that were correctly retained by GRIN; “true negative” genes were randomly added genes  
465 that were correctly removed by GRIN; “false positive” genes were randomly added genes that  
466 were incorrectly retained by GRIN; and “false negative” genes were gold genes that were  
467 incorrectly removed by GRIN. ROC (false positive rate vs true positive rate), and PR curves  
468 (precision vs recall) were generated and area under ROC (AUROC) and area under PRC  
469 (AUPRC) values were calculated for each test gene set. Median AUROC and AUPRC were  
470 calculated for each of the 30 gold standard gene sets to indicate whether Stage 1 of GRIN ranked

471 gold genes more highly than random genes in general. After estimating the optimal cutoff  $C$  at  
472 Stage 2, precision, recall, and specificity (true negatives / true negatives + false positives) were  
473 calculated for the genes removed and the genes retained by Stage 2. Median precision, recall, and  
474 specificity values were calculated across the 100 test gene sets for each of the 30 gold standard  
475 gene sets. Values are presented as median +/- interquartile range (IQR).

476 GRIN was also tested on unequal ratios of gold standard genes and random genes using  
477 the dopaminergic synaptic signaling gene set from GO (GO:0001963) and Acute Kidney Failure  
478 gene set from DisGeNET (C0022660) – 2:1 gold genes to random genes, 1:2 gold genes to  
479 random genes, and 1:4 gold genes to random genes. For each ratio of gold standard genes to  
480 noise, 100 test sets were generated. Notably as precision increases (reduction of false positives),  
481 there is a compensatory decrease in recall, as there is the possibility of throwing out too many  
482 true positives, leading to an increased number of false negatives. Since there is a higher precision  
483 value at lower noise levels, there is an inverse trend of decreasing recall at lower noise levels.

484 Finally, to test whether GRIN could remove random genes from gene sets containing  
485 multiple groups belonging to biological processes that were functionally distinct, multiple gold  
486 gene sets were combined and random noise also added. Dopaminergic synaptic transmission  
487 (GO:0001963; 23 genes) and central nervous system myelination (GO:0022010; 20 genes) were  
488 mixed with two ratios of random to gold standard genes – 2:1 gold genes:noise and 1:1 gold  
489 genes:noise. This process was repeated to generate 100 gene sets of gold standard and random  
490 genes for each ratio examined.

491

492 **Million Veteran Program (MVP) suicide attempt genome wide association study (GWAS)**  
493 **summary statistics.**

494 Suicide attempts were identified from United States veterans as described previously<sup>11</sup>.  
495 Suicide attempts were characterized by using a combination of Veterans Healthcare  
496 Administration (VHA) databases from the VA: the Suicide Prevention Application Network  
497 (SPAN) database, electronic health record (EHR) information from the VA Corporate Data  
498 Warehouse (CDW), and the CDW Mental Health Domain survey. For the MVP diagnosis,  
499 suicide attempt was determined by the presence of one or more of the following International  
500 Statistical Classification of Diseases and Related Health Problems (ICD)-9 and ICD-10  
501 diagnostic codes in a subject's EHR: ICD-9: E950-959; ICD-10: T14.91, X60-62, X64, X66-  
502 X83, Y87.0, Z91.5. Control patients were obtained from veterans enrolled in MVP without a  
503 history of suicide attempt or suicidal ideation as determined by a combination of SPAN survey,  
504 Mental Health Domain survey, and ICD diagnostic codes in the CDW database (suicidal ideation  
505 codes: ICD-9: V62.84; ICD-10: R45.851). A total of 410,464 controls from various ancestries  
506 (African, Asian, European, and Hispanic) were included for genome-wide association along with  
507 14,535 cases of non-fatal suicide attempt and 294 fatal attempts. Genome-wide association  
508 analyses were conducted using DNA from whole blood samples from subjects enrolled in MVP  
509 using a custom Affymetrix Biobank Array. Quality control and imputation was performed as  
510 previously described<sup>10</sup>. All subjects provided informed consent and the activities used to  
511 generate the GWAS summary statistics were approved by the VA Central Institutional Review  
512 Board and all activities were approved by the Oak Ridge National Laboratory Institutional  
513 Review Board.  
514



515 **International Suicide Genetics Consortium (ISGC) suicide attempt GWAS summary**  
516 **statistics.**

517 Suicide attempt summary statistics were analyzed from two sets of suicide attempt  
518 summary statistics derived from civilian populations compiled by the ISGC<sup>9</sup>. SNPs were  
519 included from a general population of European ancestry (SA-EUR) as 26,590 cases of suicide  
520 attempt and 492,022 control subjects. Furthermore, additional summary statistics were derived  
521 from this general population conditioned on diagnosis status for major depressive disorder (SA-  
522 MDD) to generate an additional set of suicide attempt summary statistics. Thus, while the SA-  
523 MDD summary statistics are not independent of the SA-EUR summary statistics as they are  
524 comprised of the same set of controls and cases of suicide attempt, both SA-EUR and SA-MDD  
525 summary statistics were analyzed in order to determine the overlap between these results and  
526 results from the MVP cohort. All subjects involved in the ISGC provided informed consent and  
527 the activities used to generate the GWAS summary statistics were approved by local institutional  
528 review boards as previously described<sup>9</sup> and by the Oak Ridge National Laboratory Institutional  
529 Review Board.

530  
531 **SNP to gene assignment.**

532 SNPs were assigned to genes using two separate methods. H-MAGMA<sup>1</sup> was used in  
533 combination with publicly available Hi-C data from adult dorsolateral prefrontal cortex  
534 (dlPFC)<sup>55</sup> to improve intergenic SNP-to-gene assignment based on three-dimensional chromatin  
535 structure in this brain region. Adult prefrontal cortex Hi-C data was used as this brain region is  
536 known to be involved in executive function and impulsivity processes, which are disrupted in  
537 individuals with a history of suicide attempt<sup>56,57</sup> Additionally, conventional MAGMA<sup>4</sup> was used

538 as an alternate method of SNP-to-gene assignment. Thus, H-MAGMA and conventional  
539 MAGMA were applied only as methods of assigning SNPs to genes only using SNPs at given  
540 significance thresholds, rather than using these tools as gene-based tests on the entire set of  
541 summary statistics.

542 SNPs were assigned to genes from MVP, SA-EUR, or SA-MDD summary statistics at  
543 multiple thresholds ( $p < 5e^{-8}$ ,  $p < 1e^{-5}$ ,  $p < 1e^{-4}$ ,  $p < 1e^{-3}$ ,  $p < 1e^{-2}$ , and  $p < 1e^{-1}$ ; **Supplementary**  
544 **Table 2**). The union of conventional MAGMA and H-MAGMA-assigned genes (*i.e.*, all genes  
545 assigned from either method) from MVP, SA-EUR, or SA-MDD suicide attempt summary  
546 statistics were subsequently used as gene set inputs to GRIN at a threshold of  $p < 1e^{-5}$  and were  
547 filtered into retained and removed gene sets (**Supplementary Tables 5, 8, and 9**).

548

#### 549 **Gene set enrichment analysis.**

550 Gene sets from MVP and ISGC summary statistics were tested for multiple enrichments  
551 using the online ToppGene suite using ToppFun<sup>12</sup>. Gene set enrichments were analyzed using the  
552 following enrichment categories: GO: Molecular Function; GO: Biological Process; GO:  
553 Cellular Component; Human Phenotype; Pathway (all databases selected); Transcription Factor  
554 Binding Site (all databases selected); Drug (all databases selected); Disease (all databases  
555 selected). Enrichments were considered significant using a Benjamini-Hochberg false discovery  
556 rate (FDR)-adjusted  $p$ -value threshold  $< 0.05$ .

557

#### 558 **Drug to gene target networks for putative drug repurposing and side effect evaluation.**

559 Genes identified as contributing to suicide attempt pathophysiology from MVP and ISGC  
560 summary statistics were used to construct drug to gene target networks from information derived

561 from DrugBank<sup>58</sup>. Drug to gene target networks were visualized in Cytoscape<sup>59</sup> (version 3.8.2,  
562 Cytoscape Consortium) to identify drugs known to target genes of interest from MVP and ISGC  
563 summary statistics using GRIN-retained genes at  $p < 1e^{-5}$  (**Supplementary Table 20**). ISGC  
564 GWAS genes were compared to genes from the MVP cohort using Venn diagrams generated  
565 from the open source R package Vennerable (<https://github.com/js229/Vennerable>).

566

567 **Software.**

568 GRIN is available as an open-source, command-line R script for public use. The code,  
569 installation instructions, and user manual can be found at <https://github.com/sullivanka/GRIN>.

570 **Figures**

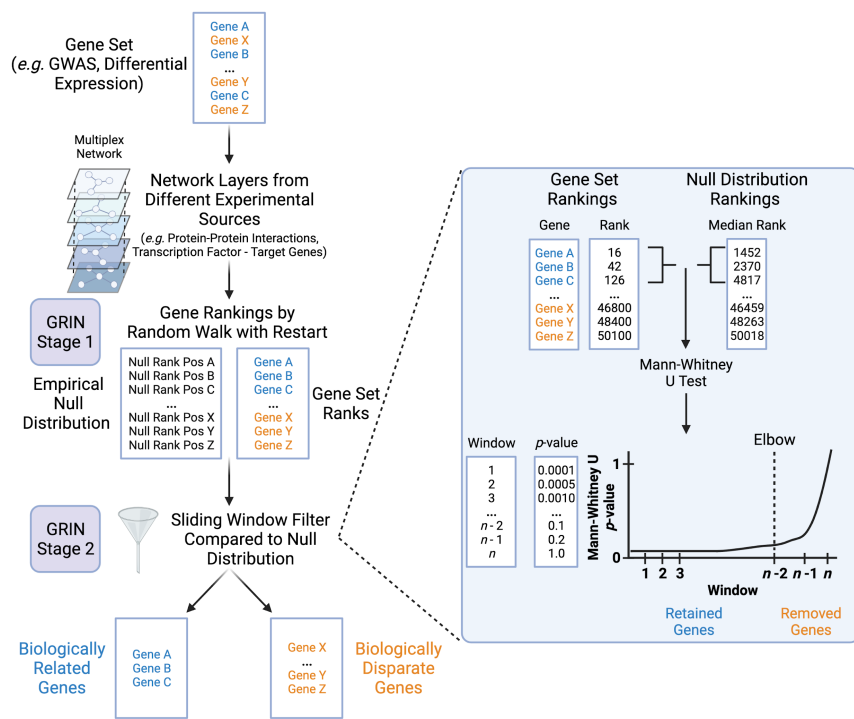

571

572 **Figure 1. Overview of GRIN – Gene set Refinement through Interacting Networks.**

573 In stage 1, GRIN requires a network composed of gene-gene connections, preferably assembled  
 574 from multiple experimental data sources. Next, the network is explored starting from all genes in  
 575 the user’s gene set using the random walk with restart algorithm, resulting in a rank-ordered list  
 576 of all genes in the network based on the frequency in which they were visited. The ordered ranks  
 577 of the user’s genes are used for stage 2, where they are compared to ordered ranks obtained from  
 578 running Stage 1 on 100 random gene sets of the same size (empirical null distribution). Using the  
 579 Mann-Whitney U test, a window of the user’s gene set ranks is compared to the empirical null  
 580 distribution of ranks to determine if the user’s gene rankings come from the same distribution as  
 581 random genes’ rankings. After using a sliding window to compare the gene ranks in this manner,  
 582 GRIN identifies a set of biologically related genes at the point at which the ranks of the user’s  
 583 gene list begin to approximate the ranks of the null distribution (elbow point of the curve). Genes  
 584 prior to the sliding window at the elbow point are retained as their ranks deviate from the null  
 585 distribution, while genes beyond this point are removed.

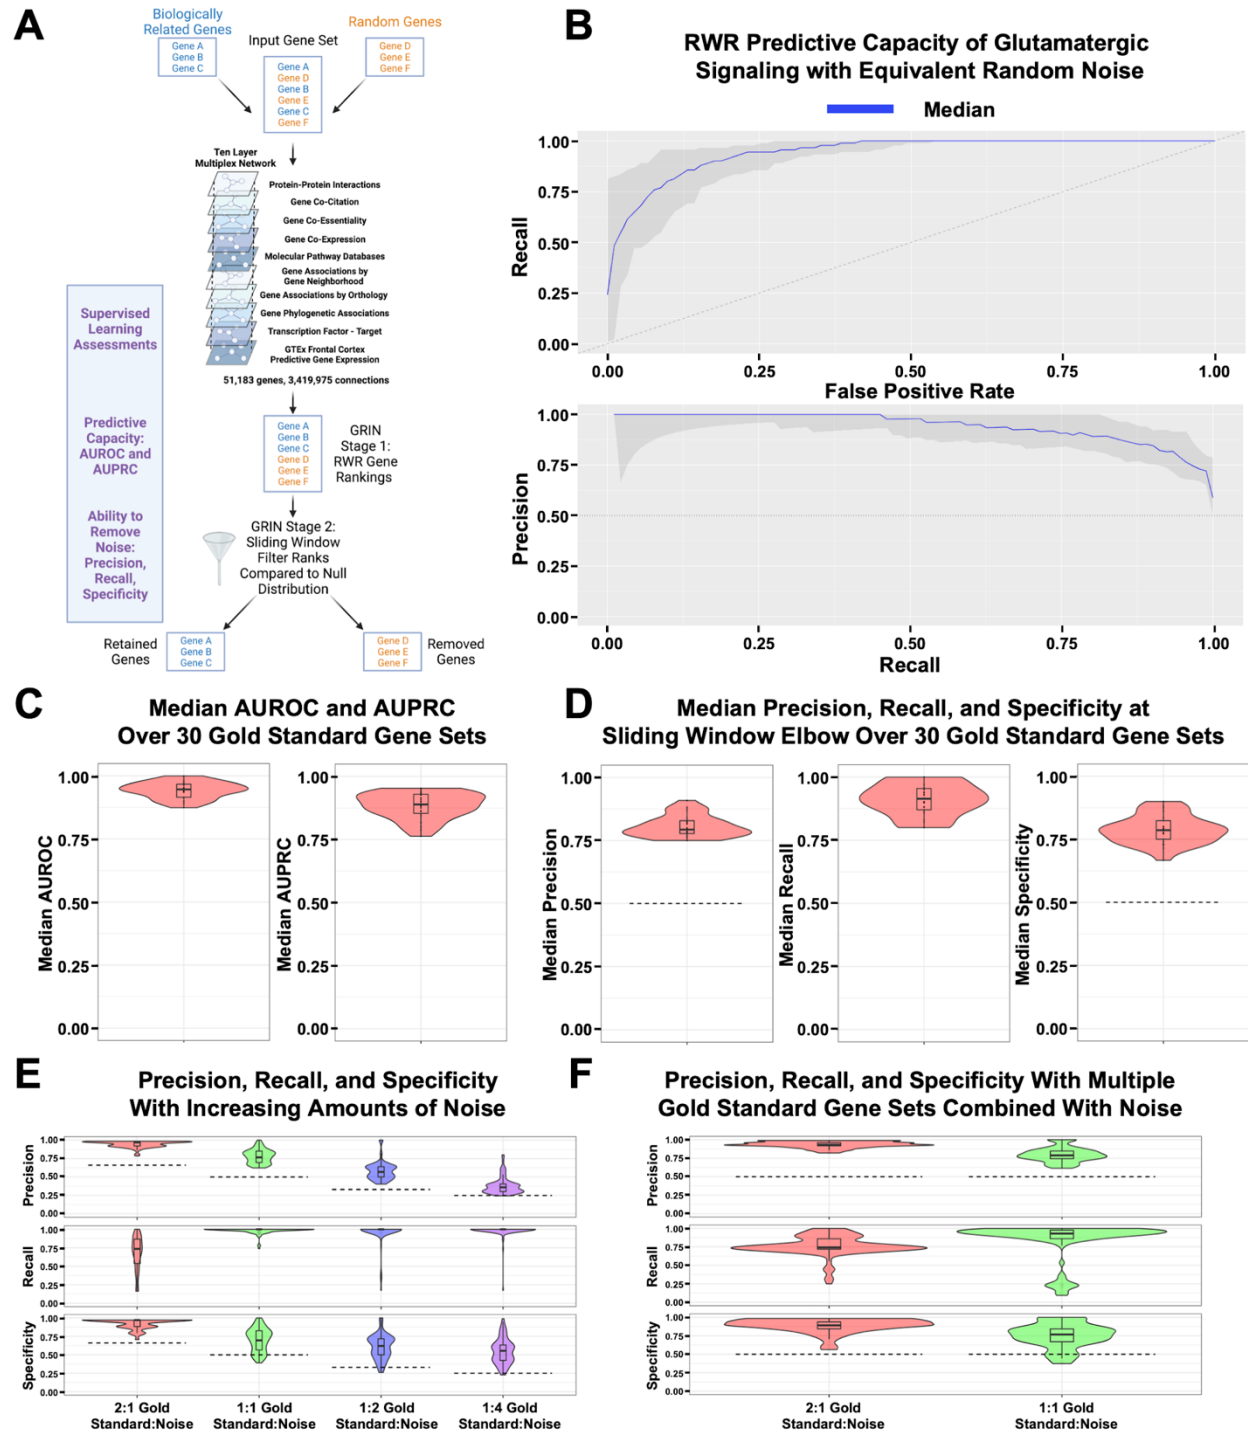

586 **Figure 2. GRIN retains biologically interrelated genes.**

587 **A.** Workflow for assessing the capacity of GRIN to identify biologically related genes from well-  
 588 defined, “gold standard” gene sets (GO, OMIM, DisGeNET) mixed with random genes. Figure  
 589 made with BioRender.com. **B.** Receiver-operating characteristic (ROC) curve and precision-  
 590 recall curves (PRC) for GRIN. The blue line represents the mean of GRIN performance over 100  
 591 sets of glutamatergic signaling genes (GO:0035249) intermixed with an equivalent number of  
 592 random genes from the multiplex network. Gray values indicate maximum and minimum values

593 over 100 sets, and dotted lines indicate classification values based on random chance. **C.** Median  
594 area under ROC (AUROC) and PRC (AUPRC) values for 100 sets of random genes intermixed  
595 with a gold standard gene set for 30 distinct gold standard gene sets. **D.** Median precision, recall,  
596 and specificity values for 100 sets of a gold standard gene set intermixed with an equivalent  
597 number of random genes, repeated for 30 distinct gold standard gene sets. **E.** Violin and box  
598 plots of precision, recall, and specificity values for 100 sets of dopaminergic synaptic signaling  
599 (GO:0001963) gold standard genes intermixed with different ratios of random genes (Noise).  
600 Median precision: 0.970 (2:1), 0.767 (1:1), 0.568 (1:2), 0.360 (1:4). Median recall: 0.735 (2:1),  
601 1.00 (1:1), 1.00 (1:2), 1.00 (1:4). Median specificity: 0.970 (2:1), 0.696 (1:1), 0.620 (1:2), 0.554  
602 (1:4) **F.** Precision, recall, and specificity values for 100 sets of dopaminergic synaptic signaling  
603 (GO:0001963) and myelination (GO:0022010) gold standard genes mixed with a ratio of 50%  
604 noise (2:1 Gold Std:Noise) or an equivalent ratio (1:1 Gold Std:Noise) of random genes.  
605

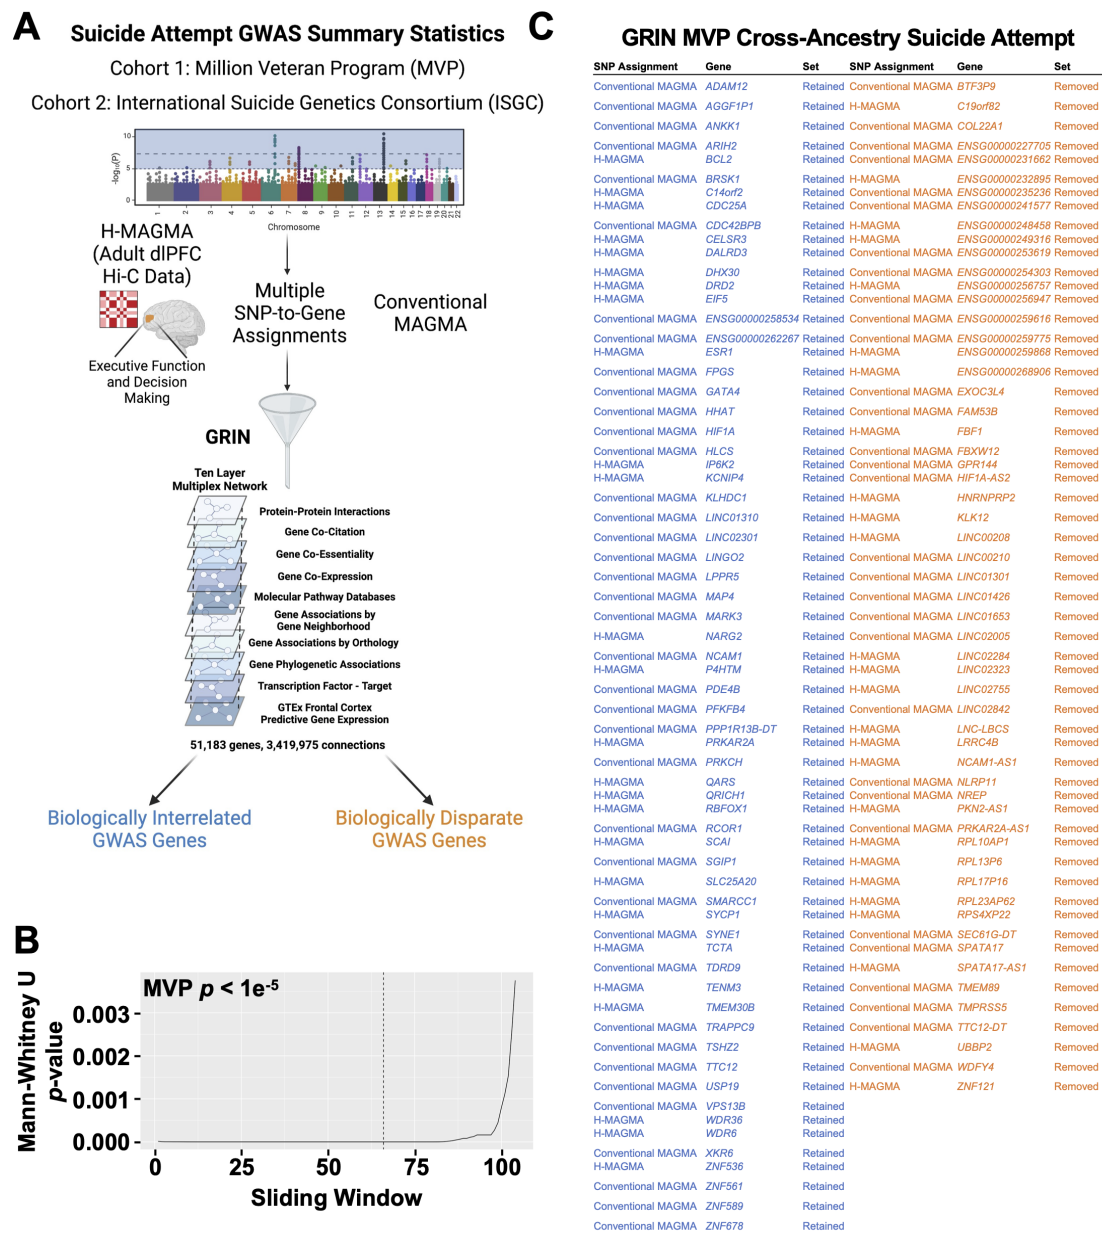

606  
607 **Figure 3. GRIN identifies biologically interrelated genes from suicide attempt summary**  
608 **statistics from United States veterans.**  
609 **A.** Workflow for identifying biologically interrelated genes from genome-wide association study  
610 (GWAS) summary statistics of suicide attempt from Million Veteran Program (MVP) and  
611 International Suicide Genetics Consortium (ISGC) cohorts. Figure made with BioRender.com. **B.**  
612 Sliding window  $p$ -values of Mann-Whitney U test for the union of H-MAGMA and conventional  
613 MAGMA-assigned genes from MVP GWAS summary statistics using SNPs with a threshold of  
614  $p < 1e^{-5}$ . Dotted line indicates the elbow point of the curve used to determine which genes were  
615 retained by GRIN. **C.** Gene lists of retained (blue) and removed (orange) genes from MVP  
616 summary statistics as determined by GRIN based on H-MAGMA or conventional MAGMA  
617 SNP-to-gene assignment.

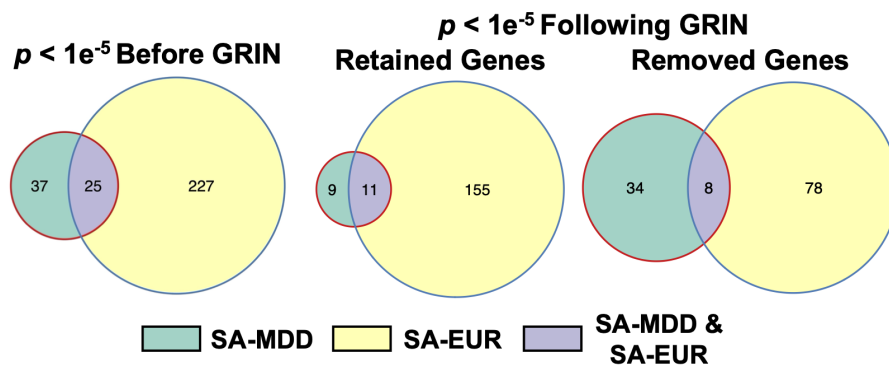

618  
619 **Figure 4. GRIN retains and removes genes common to two sets of civilian suicide attempt**  
620 **summary statistics.**

621 Venn diagrams of the number of genes before GRIN (left) and retained and removed genes  
622 following GRIN from suicide attempt of general European population (SA-EUR) and  
623 conditioned on major depressive disorder diagnosis (SA-MDD) at  $p < 1e^{-5}$ . A majority of the  
624 retained genes from SA-MDD were also retained from the SA-EUR summary statistics.



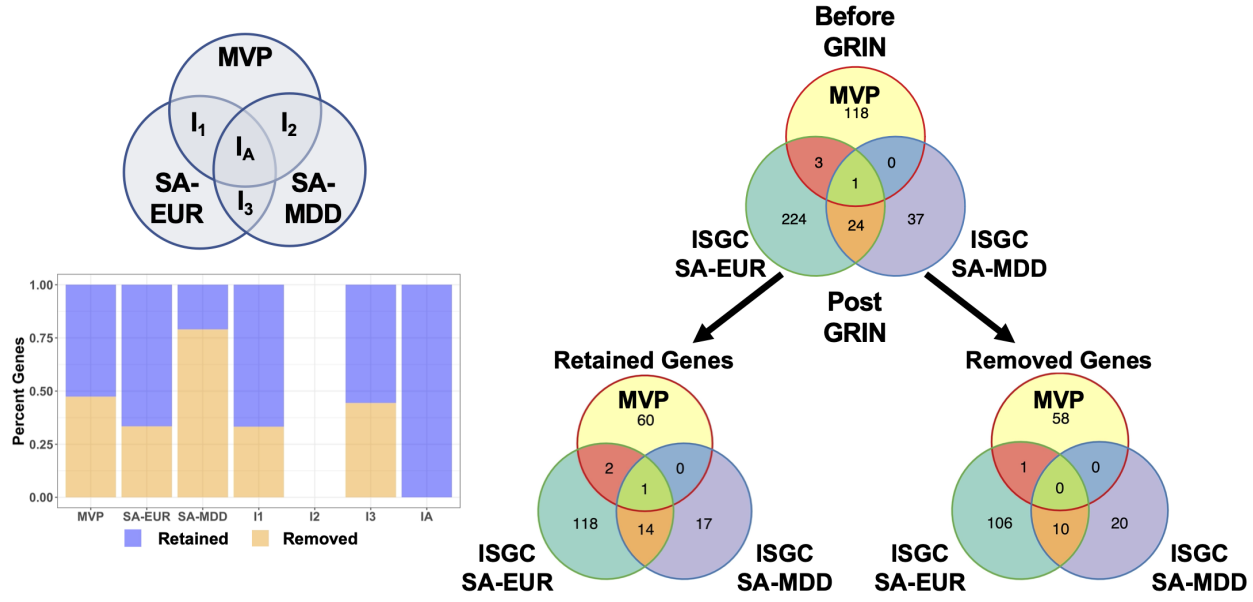

625  
626  
627  
628  
629  
630  
631  
632  
633  
634

**Figure 5. GRIN retains a majority of genes common among distinct suicide attempt summary statistics.**

Venn diagrams of GRIN retained and removed genes from the union of MVP, SA-EUR, and SA-MDD suicide attempt summary statistics from genes assigned from SNPs at  $p < 1e^{-5}$ . Most genes common to multiple summary statistics were retained, as indicated by percentage of retained (orange) and removed (blue) genes in multiple sets of summary statistics.  $I_1$  = overlapping genes between MVP and SA-EUR,  $I_2$  = overlapping genes between MVP and SA-MDD,  $I_3$  = overlapping genes between SA-EUR and SA-MDD,  $I_A$  = genes common to all summary statistics.

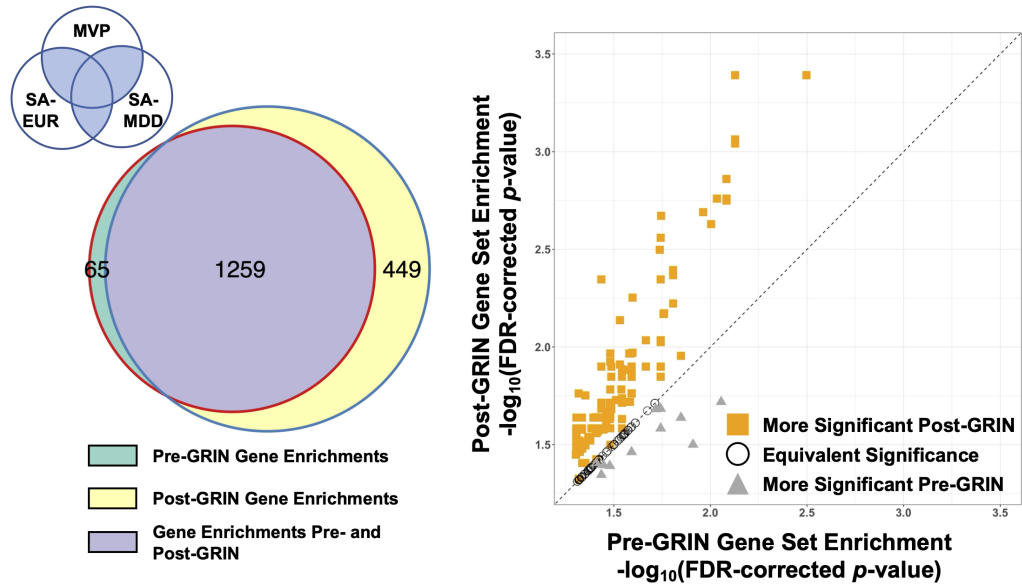

635  
 636 **Figure 6. GRIN enhances gene set enrichment analysis.**  
 637 Left: Using genes intersecting in two or more GWAS summary statistics (shaded blue region of  
 638 Venn diagram) prior to GRIN resulted in 1324 enrichments. Intersecting genes retained by GRIN  
 639 resulted in 1708 enrichments, 1259 of which were common prior to GRIN. Green: Enrichments  
 640 using intersecting genes prior to GRIN; yellow: enrichments using intersecting genes from GRIN  
 641 retained genes; purple: enrichments common to unfiltered and GRIN-retained genes. Right: Of  
 642 the 1259 enrichments common before and after applying GRIN, these enrichments were likely to  
 643 be more statistically significant (1048 enrichments, orange squares) compared to equivalent  
 644 significance (205 enrichments, open circles) or less significance (gray triangles). Diagonal line  
 645 indicates equivalent  $p$ -values before and after GRIN. Threshold for enrichment inclusion was –  
 646  $\log_{10}(\text{FDR-corrected } p\text{-value}) > 1.30103$  (FDR-corrected  $p$ -value < 0.05).

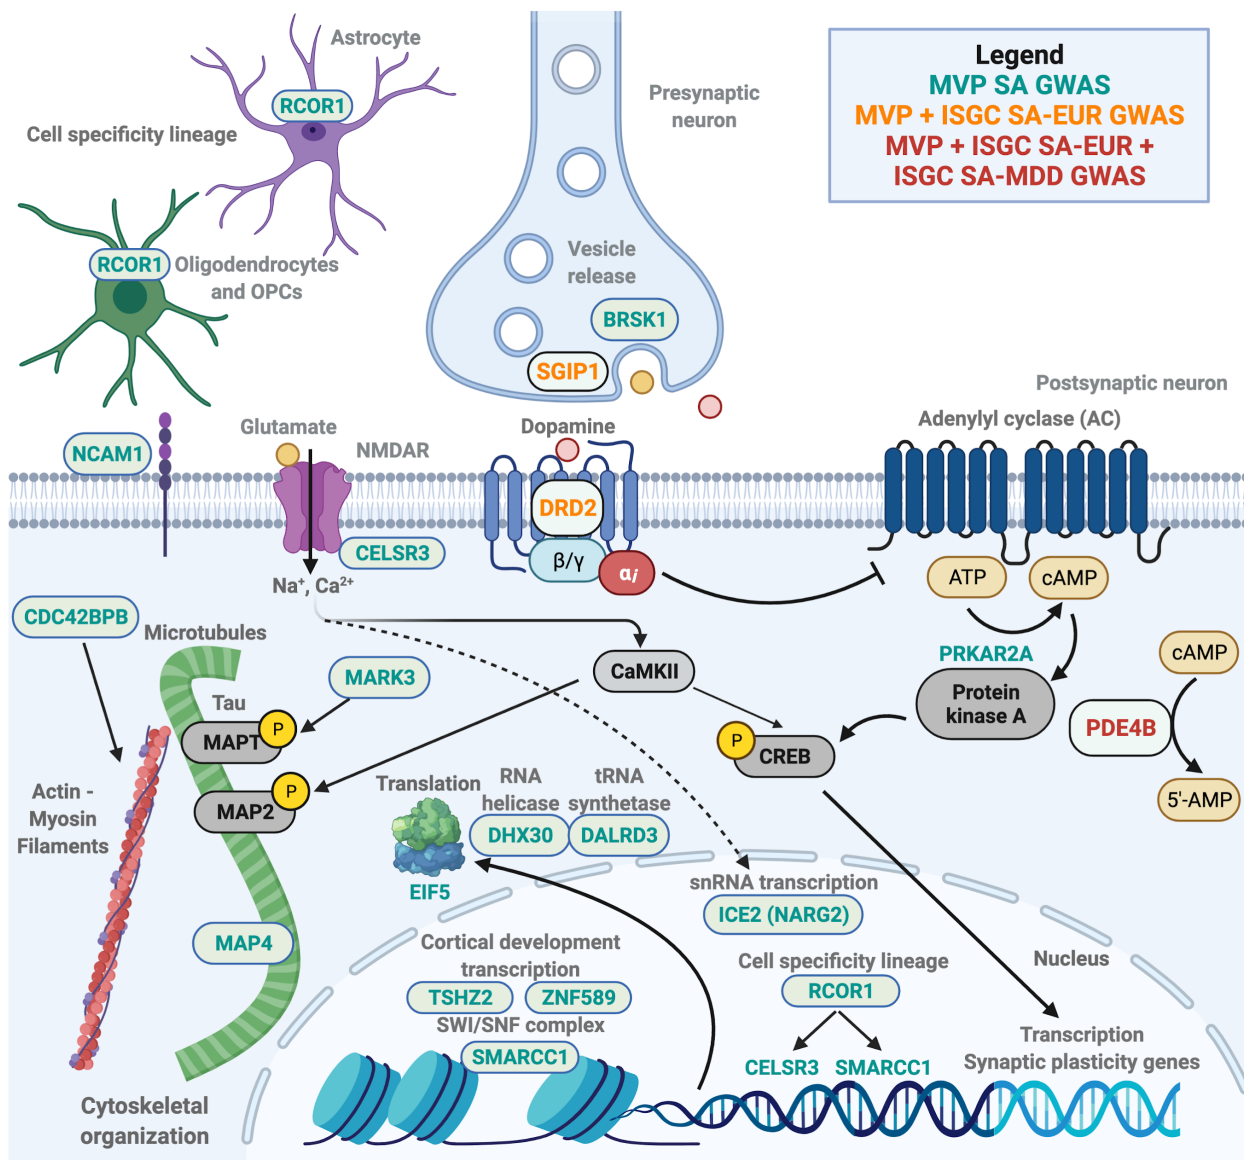

647  
 648 **Figure 7. Neurobiological mechanisms implicated in suicide attempt pathophysiology as**  
 649 **determined by GWAS summary statistics and GRIN.**  
 650 GRIN retained genes from MVP suicide attempt GWAS (cyan), MVP and ISGC general  
 651 population GWAS (orange), and MVP and both ISGC suicide attempt summary statistics (red).  
 652 A number of genes related to dopaminergic signaling (*DRD2*, *PRKAR2A*, and *PDE4B*) were  
 653 identified, as well as presynaptic vesicle release (*BRSK1*, *SGIP1*), glutamatergic synapse  
 654 formation (*CELSR3*), and synaptic plasticity (*NCAM1*). Genes related to cytoskeletal  
 655 reorganization (*CDC42BPB*, *MAP4*, and *MARK3*) were also implicated in suicide attempt  
 656 GWAS. Genes related to chromatin reorganization (*SMARCC1*), cortical development (*TSHZ2*,  
 657 *ZNF589*), cell lineage (*RCOR1*), and translation processes (*DALRD3*, *DHX30*, and *EIF5*) were  
 658 also retained by GRIN. Together, GRIN retained genes from multiple coincident biological  
 659 processes underlying suicide pathophysiology. Figure made with BioRender.com.

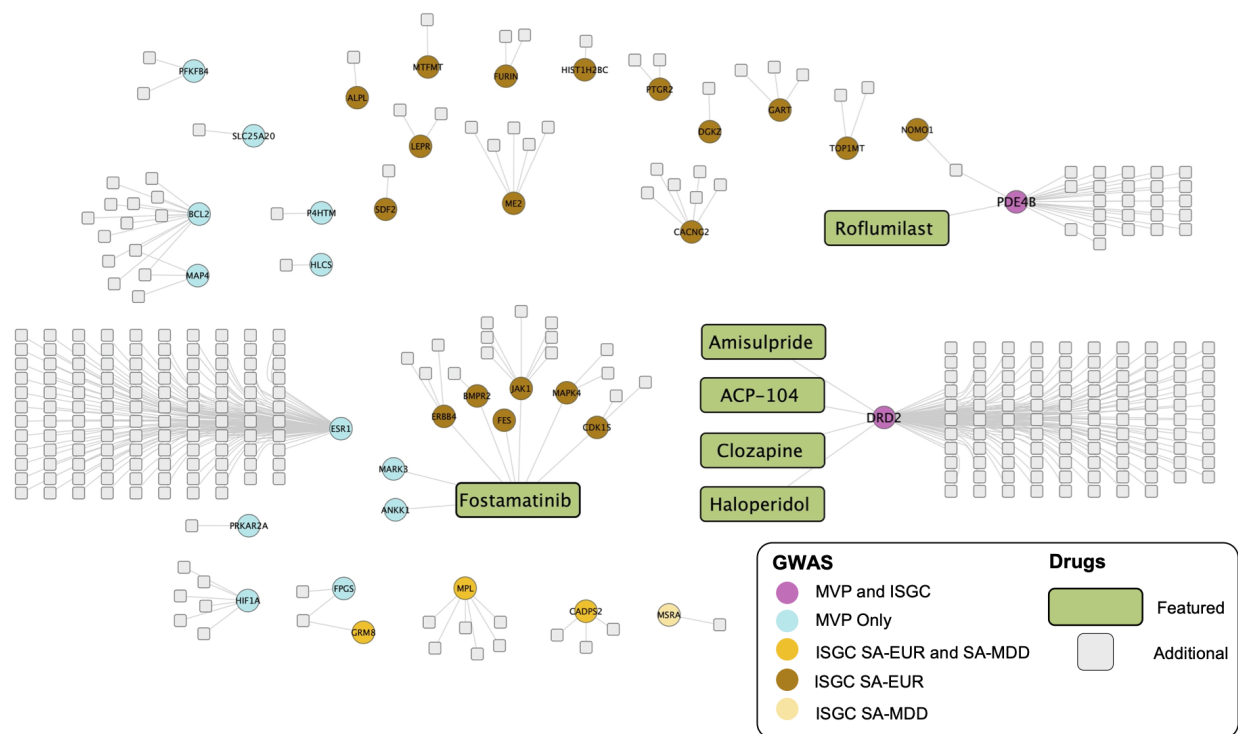

660  
 661 **Figure 8. Network association of drugs and drug targets identified by suicide attempt**  
 662 **GWAS.**  
 663 Network diagram of DrugBank drugs (featured drugs green, additional drugs gray) and drug  
 664 target genes from genes retained by GRIN applied to MVP and ISGC suicide attempt summary  
 665 statistics at  $p < 1e^{-5}$  threshold. The dopamine D2 receptor (*DRD2*), phosphodiesterase 4B  
 666 (*PDE4B*), and estrogen receptor 1 (*ESR1*) are targeted by many drugs, while fostamatinib targets  
 667 8 genes implicated by suicide attempt GWAS followed by GRIN. Magenta: genes implicated in  
 668 MVP and both SA-EUR and SA-MDD ISGC summary statistics; cyan: genes implicated in MVP  
 669 only; orange: genes implicated in both SA-EUR and SA-MDD; brown: genes implicated in SA-  
 670 EUR only; yellow: genes implicated in SA-MDD only.

## 671 References

- 672 1. Sey, N. Y. A. *et al.* A computational tool (H-MAGMA) for improved prediction of brain-  
673 disorder risk genes by incorporating brain chromatin interaction profiles. *Nat. Neurosci.* **23**,  
674 583–593 (2020).
- 675 2. Hall, M. A. *et al.* Novel EDGE encoding method enhances ability to identify genetic  
676 interactions. *PLoS Genet.* **17**, e1009534 (2021).
- 677 3. Petersen, A., Alvarez, C., DeClaire, S. & Tintle, N. L. Assessing methods for assigning  
678 SNPs to genes in gene-based tests of association using common variants. *PLoS One* **8**,  
679 e62161 (2013).
- 680 4. de Leeuw, C. A., Mooij, J. M., Heskes, T. & Posthuma, D. MAGMA: generalized gene-set  
681 analysis of GWAS data. *PLoS Comput. Biol.* **11**, e1004219 (2015).
- 682 5. Boyle, E. A., Li, Y. I. & Pritchard, J. K. An Expanded View of Complex Traits: From  
683 Polygenic to Omnigenic. *Cell* **169**, 1177–1186 (2017).
- 684 6. Gosak, M. *et al.* Network science of biological systems at different scales: A review. *Phys.*  
685 *Life Rev.* **24**, 118–135 (2018).
- 686 7. Voracek, M. & Loibl, L. M. Genetics of suicide: a systematic review of twin studies. *Wien.*  
687 *Klin. Wochenschr.* **119**, 463–475 (2007).
- 688 8. Erlangsen, A. *et al.* Genetics of suicide attempts in individuals with and without mental  
689 disorders: a population-based genome-wide association study. *Mol. Psychiatry* **25**, 2410–  
690 2421 (2020).
- 691 9. Mullins, N. *et al.* Dissecting the Shared Genetic Architecture of Suicide Attempt,  
692 Psychiatric Disorders, and Known Risk Factors. *Biol. Psychiatry* (2021)  
693 doi:10.1016/j.biopsych.2021.05.029.

- 694 10. Kimbrel, N. A. *et al.* A genome-wide association study of suicide attempts and suicidal  
695 ideation in U.S. military veterans. *Psychiatry Res.* **269**, 64–69 (2018).
- 696 11. Kimbrel, N. A. *et al.* A genome-wide association study of suicide attempts in the million  
697 veterans program identifies evidence of pan-ancestry and ancestry-specific risk loci. *Mol.*  
698 *Psychiatry* (2022) doi:10.1038/s41380-022-01472-3.
- 699 12. Chen, J., Bardes, E. E., Aronow, B. J. & Jegga, A. G. ToppGene Suite for gene list  
700 enrichment analysis and candidate gene prioritization. *Nucleic Acids Res.* **37**, W305–11  
701 (2009).
- 702 13. Wang, H., Xu, J., Lazarovici, P., Quirion, R. & Zheng, W. cAMP Response Element-  
703 Binding Protein (CREB): A Possible Signaling Molecule Link in the Pathophysiology of  
704 Schizophrenia. *Front. Mol. Neurosci.* **11**, 255 (2018).
- 705 14. Dvorakova, M. *et al.* SGIP1 is involved in regulation of emotionality, mood, and  
706 nociception and modulates in vivo signalling of cannabinoid CB1 receptors. *Br. J.*  
707 *Pharmacol.* **178**, 1588–1604 (2021).
- 708 15. Trevaskis, J. *et al.* Src homology 3-domain growth factor receptor-bound 2-like (endophilin)  
709 interacting protein 1, a novel neuronal protein that regulates energy balance. *Endocrinology*  
710 **146**, 3757–3764 (2005).
- 711 16. Thakar, S. *et al.* Evidence for opposing roles of Celsr3 and Vangl2 in glutamatergic synapse  
712 formation. *Proc. Natl. Acad. Sci. U. S. A.* **114**, E610–E618 (2017).
- 713 17. Sugiura, N., Patel, R. G. & Corriveau, R. A. N-methyl-D-aspartate receptors regulate a  
714 group of transiently expressed genes in the developing brain. *J. Biol. Chem.* **276**, 14257–  
715 14263 (2001).
- 716 18. Takahashi, H. *et al.* MED26 regulates the transcription of snRNA genes through the

- 717 recruitment of little elongation complex. *Nat. Commun.* **6**, 5941 (2015).
- 718 19. Vukojevic, V. *et al.* Evolutionary conserved role of neural cell adhesion molecule-1 in  
719 memory. *Transl. Psychiatry* **10**, 217 (2020).
- 720 20. Walmod, P. S., Kolkova, K., Berezin, V. & Bock, E. Zippers make signals: NCAM-  
721 mediated molecular interactions and signal transduction. *Neurochem. Res.* **29**, 2015–2035  
722 (2004).
- 723 21. Monaghan, C. E. *et al.* REST corepressors RCOR1 and RCOR2 and the repressor INSM1  
724 regulate the proliferation-differentiation balance in the developing brain. *Proc. Natl. Acad.*  
725 *Sci. U. S. A.* **114**, E406–E415 (2017).
- 726 22. Abrajano, J. J. *et al.* Differential deployment of REST and CoREST promotes glial subtype  
727 specification and oligodendrocyte lineage maturation. *PLoS One* **4**, e7665 (2009).
- 728 23. Sokpor, G., Xie, Y., Rosenbusch, J. & Tuoc, T. Chromatin Remodeling BAF (SWI/SNF)  
729 Complexes in Neural Development and Disorders. *Front. Mol. Neurosci.* **10**, 243 (2017).
- 730 24. Caubit, X., Tiveron, M.-C., Cremer, H. & Fasano, L. Expression patterns of the three  
731 Teashirt-related genes define specific boundaries in the developing and postnatal mouse  
732 forebrain. *J. Comp. Neurol.* **486**, 76–88 (2005).
- 733 25. Lessel, D. *et al.* De Novo Missense Mutations in DHX30 Impair Global Translation and  
734 Cause a Neurodevelopmental Disorder. *Am. J. Hum. Genet.* **101**, 716–724 (2017).
- 735 26. Lentini, J. M., Alsaif, H. S., Faqeih, E., Alkuraya, F. S. & Fu, D. DALRD3 encodes a  
736 protein mutated in epileptic encephalopathy that targets arginine tRNAs for 3-  
737 methylcytosine modification. *Nat. Commun.* **11**, 2510 (2020).
- 738 27. Meltzer, H. Y. *et al.* Clozapine treatment for suicidality in schizophrenia: International  
739 Suicide Prevention Trial (InterSePT). *Arch. Gen. Psychiatry* **60**, 82–91 (2003).

- 740 28. Carlin, D. E. *et al.* A Fast and Flexible Framework for Network-Assisted Genomic  
741 Association. *iScience* **16**, 155–161 (2019).
- 742 29. Hristov, B. H., Chazelle, B. & Singh, M. uKIN Combines New and Prior Information with  
743 Guided Network Propagation to Accurately Identify Disease Genes. *Cell Syst* **10**, 470–  
744 479.e3 (2020).
- 745 30. Shim, J. E. *et al.* GWAB: a web server for the network-based boosting of human genome-  
746 wide association data. *Nucleic Acids Res.* **45**, W154–W161 (2017).
- 747 31. Hwang, S. *et al.* HumanNet v2: Human gene networks for disease research. *Nucleic Acids*  
748 *Res.* **47**, D573–D580 (2019).
- 749 32. Kim, H. *et al.* YeastNet v3: a public database of data-specific and integrated functional gene  
750 networks for *Saccharomyces cerevisiae*. *Nucleic Acids Res.* **42**, D731–6 (2014).
- 751 33. Lee, T. *et al.* AraNet v2: an improved database of co-functional gene networks for the study  
752 of *Arabidopsis thaliana* and 27 other nonmodel plant species. *Nucleic Acids Res.* **43**, D996–  
753 1002 (2015).
- 754 34. Cliff, A. *et al.* A High-Performance Computing Implementation of Iterative Random Forest  
755 for the Creation of Predictive Expression Networks. *Genes* **10**, (2019).
- 756 35. Chilton, I. *et al.* De novo heterozygous missense and loss-of-function variants in  
757 CDC42BPB are associated with a neurodevelopmental phenotype. *Am. J. Med. Genet. A*  
758 **182**, 962–973 (2020).
- 759 36. Agha, Z. *et al.* Exome sequencing identifies three novel candidate genes implicated in  
760 intellectual disability. *PLoS One* **9**, e112687 (2014).
- 761 37. Wang, X.-X. *et al.* MRCK $\beta$  links *Dasm1* to actin rearrangements to promote dendrite  
762 development. *J. Biol. Chem.* **296**, 100730 (2021).



- 763 38. Li, L. *et al.* Protein kinases paralleling late-phase LTP formation in dorsal hippocampus in  
764 the rat. *Neurochem. Int.* **76**, 50–58 (2014).
- 765 39. Lund, H. *et al.* MARK4 and MARK3 associate with early tau phosphorylation in  
766 Alzheimer’s disease granulovacuolar degeneration bodies. *Acta Neuropathol Commun* **2**, 22  
767 (2014).
- 768 40. Doki, C. *et al.* Microtubule elongation along actin filaments induced by microtubule-  
769 associated protein 4 contributes to the formation of cellular protrusions. *J. Biochem.* **168**,  
770 295–303 (2020).
- 771 41. Neale, B. M. *et al.* Patterns and rates of exonic de novo mutations in autism spectrum  
772 disorders. *Nature* **485**, 242–245 (2012).
- 773 42. Rehni, A. K., Singh, T. G. & Chand, P. Amisulpride-induced seizurogenic effect: a potential  
774 role of opioid receptor-linked transduction systems. *Basic Clin. Pharmacol. Toxicol.* **108**,  
775 310–317 (2011).
- 776 43. Rolf, M. G. *et al.* In vitro pharmacological profiling of R406 identifies molecular targets  
777 underlying the clinical effects of fostamatinib. *Pharmacol Res Perspect* **3**, e00175 (2015).
- 778 44. Pinner, N. A., Hamilton, L. A. & Hughes, A. Roflumilast: a phosphodiesterase-4 inhibitor  
779 for the treatment of severe chronic obstructive pulmonary disease. *Clin. Ther.* **34**, 56–66  
780 (2012).
- 781 45. Valdeolivas, A. *et al.* Random walk with restart on multiplex and heterogeneous biological  
782 networks. *Bioinformatics* **35**, 497–505 (2019).
- 783 46. Wang, T. *et al.* Gene Essentiality Profiling Reveals Gene Networks and Synthetic Lethal  
784 Interactions with Oncogenic Ras. *Cell* **168**, 890–903.e15 (2017).
- 785 47. Szklarczyk, D. *et al.* STRING v11: protein–protein association networks with increased

- 786 coverage, supporting functional discovery in genome-wide experimental datasets. *Nucleic*  
787 *Acids Res.* **47**, D607–D613 (2018).
- 788 48. Pearl, J. R. *et al.* Genome-Scale Transcriptional Regulatory Network Models of Psychiatric  
789 and Neurodegenerative Disorders. *Cell Syst* **8**, 122–135.e7 (2019).
- 790 49. Basu, S., Kumbier, K., Brown, J. B. & Yu, B. Iterative random forests to discover predictive  
791 and stable high-order interactions. *Proc. Natl. Acad. Sci. U. S. A.* **115**, 1943–1948 (2018).
- 792 50. GTEx Consortium. The Genotype-Tissue Expression (GTEx) project. *Nat. Genet.* **45**, 580–  
793 585 (2013).
- 794 51. Di Nanni, N., Bersanelli, M., Milanesi, L. & Mosca, E. Network Diffusion Promotes the  
795 Integrative Analysis of Multiple Omics. *Front. Genet.* **11**, 106 (2020).
- 796 52. Harris, M. A. *et al.* The Gene Ontology (GO) database and informatics resource. *Nucleic*  
797 *Acids Res.* **32**, D258–61 (2004).
- 798 53. Amberger, J. S., Bocchini, C. A., Schiettecatte, F., Scott, A. F. & Hamosh, A. OMIM.org:  
799 Online Mendelian Inheritance in Man (OMIM®), an online catalog of human genes and  
800 genetic disorders. *Nucleic Acids Res.* **43**, D789–98 (2015).
- 801 54. Piñero, J. *et al.* DisGeNET: a comprehensive platform integrating information on human  
802 disease-associated genes and variants. *Nucleic Acids Res.* **45**, D833–D839 (2017).
- 803 55. Wang, D. *et al.* Comprehensive functional genomic resource and integrative model for the  
804 human brain. *Science* **362**, (2018).
- 805 56. Zhang, H. *et al.* Aberrant White Matter Microstructure in Depressed Patients with  
806 Suicidality. *J. Magn. Reson. Imaging* (2021) doi:10.1002/jmri.27927.
- 807 57. Cao, J. *et al.* The Association Between Resting State Functional Connectivity and the Trait  
808 of Impulsivity and Suicidal Ideation in Young Depressed Patients With Suicide Attempts.

- 809        *Front. Psychiatry* **12**, 567976 (2021).
- 810    58. Wishart, D. S. *et al.* DrugBank: a knowledgebase for drugs, drug actions and drug targets.
- 811        *Nucleic Acids Res.* **36**, D901–6 (2008).
- 812    59. Shannon, P. *et al.* Cytoscape: a software environment for integrated models of biomolecular
- 813        interaction networks. *Genome Res.* **13**, 2498–2504 (2003).
- 814
- 815
